# Supplementary material for: Effect of tillage and crop residue on soil temperature following planting for a Black soil in Northeast China
Source: PubMed Central journal article supplement (PMC5852035; doi:10.1038/s41598-018-22822-8), 2018-03-14
Supplement: 41598_2018_22822_MOESM1_ESM.pdf [file 41598_2018_22822_MOESM1_ESM.pdf]

# **Effect of tillage and crop residue on soil temperature following planting for a Black soil in Northeast China**

Yan Shen<sup>1</sup>, Neil McLaughlin<sup>2</sup>, Xiaoping Zhang<sup>3</sup>, Minggang Xu<sup>1</sup>, & Aizhen Liang<sup>3,4\*</sup>

<sup>1</sup>Institute of Agricultural Resources and Regional Planning, Chinese Academy of Agricultural Sciences, Beijing, China

<sup>2</sup>Ottawa Research and Development Centre, Agriculture and Agri-Food Canada, Ottawa, Ontario, Canada

<sup>3</sup>Northeast Institute of Geography and Agroecology, Chinese Academy of Sciences, Changchun, Jilin, China

<sup>4</sup>University of Chinese Academy of Sciences, Beijing, China

Supplementary Information

**Table S1. Field management operations and their timing under three tillage treatments each year.**

| <b>Field operation<sup>†</sup></b>    | <b>MP</b>        | <b>NT</b>         | <b>RT</b>        |
|---------------------------------------|------------------|-------------------|------------------|
| Shallow cultivation                   | Late April       | -                 | -                |
| Sowing and fertilization              | Early May        | Early May         | Early May        |
| Herbicide                             | Early May        | Early May         | Early May        |
| First cultivation                     | Late May         | -                 | Late May         |
| Second herbicide if necessary         | Late May         | Late May          | Late May         |
| Hand hoeing and thinning              | Mid June         | Mid June          | Mid June         |
| Second cultivation and ridge building | Mid to late June | -                 | Mid to late June |
| Compound fertilizer side-dress        | Mid to late June | -                 | Mid to late June |
| Final cultivation and ridge building  | Late June        | -                 | Late June        |
| Compound fertilizer                   | -                | Early to mid July | -                |
| Harvest                               | Early October    | Early October     | Early October    |
| Aboveground residue returning         | -                | Early October     | Early October    |
| Fall plough and cultivation           | Late October     | -                 | -                |
| Aboveground residue returning         | Late October     | -                 | -                |

MP: mouldboard plough; NT: no till; RT: ridge till

<sup>†</sup>: operations for maize and soybean were similar but there were a few days difference between the dates of each operation
